# Supplementary material for: On the Quantum Chemical Nature of Lead(II) “Lone Pair”
Source: MDPI journal article supplement (doi:10.3390/molecules27010027), 2021-12-22
Supplement: s1 [file s1]

# On the Nature of Lead(II) “Lone Pair”

Christophe Goulaouen <sup>1,\*</sup> and Jean-Philip Piquemal <sup>2,3,4,\*</sup>

<sup>1</sup> Laboratoire de Chimie Quantique, UMR7177 CNRS et Université de Strasbourg, 67000 Strasbourg, France

<sup>2</sup> Laboratoire de Chimie Théorique, Sorbonne Université, UMR7616 CNRS, 75005 Paris, France

<sup>3</sup> Institut Universitaire de France, 75005 Paris, France

<sup>4</sup> Department of Biomedical Engineering, The University of Texas at Austin, Austin, TX 78712, USA

\* Correspondence: [goulaouen@unistra.fr](mailto:goulaouen@unistra.fr) (C.G.); [jean-philip.piquemal@sorbonne-universite.fr](mailto:jean-philip.piquemal@sorbonne-universite.fr) (J.-P.P.)

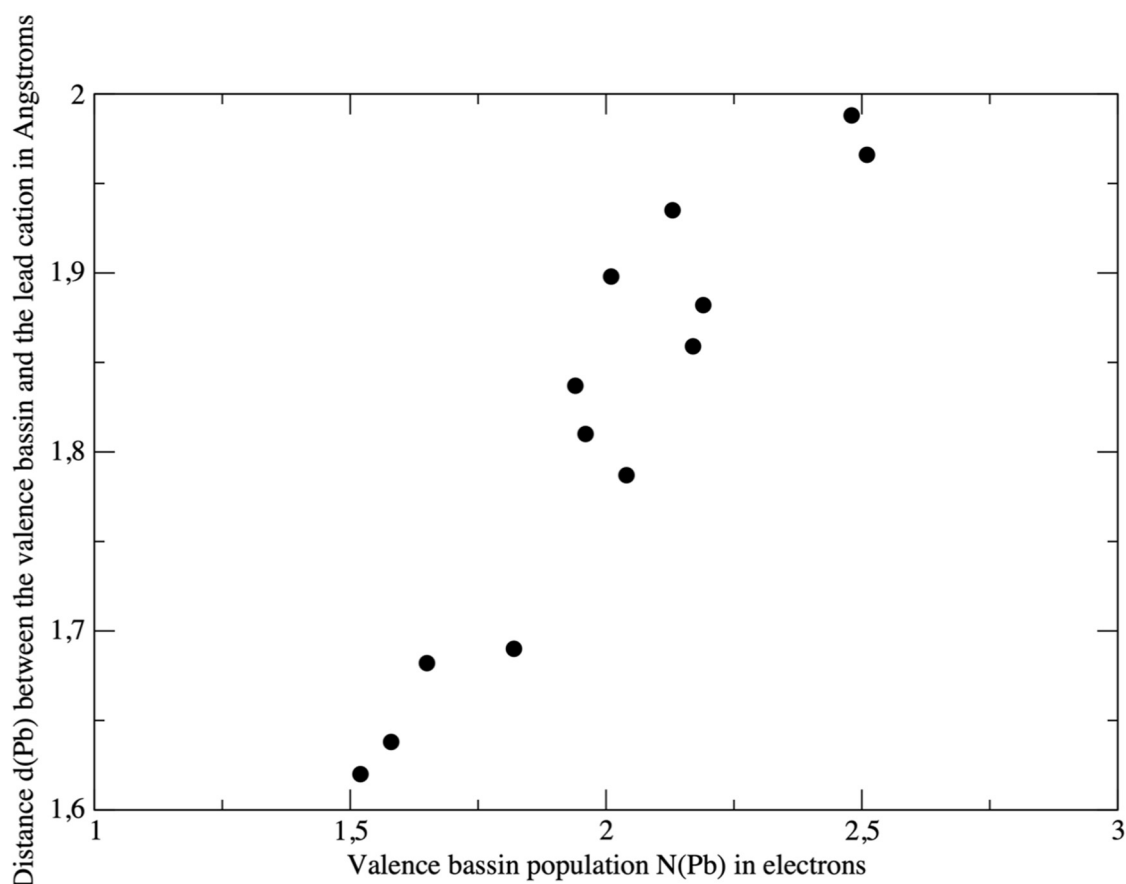

**Figure S1.** Distance between the ELF attractor of the lead valence basin in function of the population of V(Pb), data extracted from Table 3.

**Table S1.** Pb-L distances in Angströms and L-Pb-L angles in degrees of the complexes optimized with the different methods.

|                                                    | Turbomole |        | GAUSSIAN |        |        |        |
|----------------------------------------------------|-----------|--------|----------|--------|--------|--------|
|                                                    | MP2       |        | B3LYP    |        | wB97XD |        |
|                                                    | Pb-L      | L-Pb-L | Pb-L     | L-Pb-L | Pb-L   | L-Pb-L |
| [Pb(H) <sub>3</sub> ] <sup>-</sup>                 | 1.848     | 91.2   | 1.894    | 91.8   | 1.881  | 91.9   |
| [Pb(Me) <sub>3</sub> ] <sup>-</sup>                | 2.328     | 90.8   | 2.386    | 93.1   | 2.348  | 92.1   |
| [Pb(F) <sub>3</sub> ] <sup>-</sup>                 | 2.115     | 97.1   | 2.142    | 97.7   | 2.125  | 96.9   |
| [Pb(Cl) <sub>3</sub> ] <sup>-</sup>                | 2.560     | 99.8   | 2.613    | 100.8  | 2.587  | 99.5   |
| [Pb(Br) <sub>3</sub> ] <sup>-</sup>                | 2.719     | 100.6  | 2.776    | 102.2  | 2.742  | 100.5  |
| [Pb(I) <sub>3</sub> ] <sup>-</sup>                 | 2.911     | 100.8  | 2.991    | 103.2  | 2.956  | 101.2  |
| [Pb(CN) <sub>3</sub> ] <sup>-</sup>                | 2.306     | 91.9   | 2.358    | 93.6   | 2.337  | 92.7   |
| [Pb(OH) <sub>3</sub> ] <sup>-</sup>                | 2.176     | 91.8   | 2.207    | 93.4   | 2.188  | 92.6   |
| [Pb(SH) <sub>3</sub> ] <sup>-</sup>                | 2.619     | 94.6   | 2.690    | 97.2   | 2.652  | 96.0   |
| [Pb(HCN) <sub>3</sub> ] <sup>2+</sup>              | 2.415     | 84.7   | 2.457    | 89.0   | 2.447  | 87.0   |
| [Pb(CO) <sub>3</sub> ] <sup>2+</sup>               | 2.635     | 81.9   | 2.702    | 86.7   | 2.683  | 83.3   |
| [Pb(OH <sub>2</sub> ) <sub>3</sub> ] <sup>2+</sup> | 2.374     | 83.8   | 2.406    | 88.2   | 2.400  | 85.4   |
| [Pb(NH <sub>3</sub> ) <sub>3</sub> ] <sup>2+</sup> | 2.451     | 90.0   | 2.503    | 92.3   | 2.480  | 90.3   |
